# Supplementary material for: Synergistic effect of Pd/CZO catalysts and an electric field on complete combustion of lean and humid methane at low temperatures
Source: Royal Society of Chemistry journal article supplement (doi:10.1039/d4cy00699b), 2024-01-01
Supplement: d4cy00699b1.pdf [file d4cy00699b1.pdf]

## ESI (Electronic Supplementary Information)

Title:

**Synergistic effect of Pd/CZO catalysts and an electric field on complete combustion of lean and humid methane at low temperatures**

Authors:

Kei Sugiura<sup>a,b</sup>, Takuma Higo<sup>a</sup>, Nobuki Matsumoto<sup>a</sup>, Harunobu Tedzuka<sup>a</sup>, and Yasushi Sekine<sup>a\*</sup>

Affiliation:

<sup>a</sup> Department of Applied Chemistry, Waseda University, 3-4-1, Okubo, Shinjuku, Tokyo, 169-8555, Japan, E-mail: ysekine@waseda.jp

<sup>b</sup> RD Center, N.E. CHEMCAT Corporation, 678, Ipponmatsu, Numazu, Shizuoka, 410-0314, Japan, E-mail: kei.sugiura@ne-chamcat.co.jp

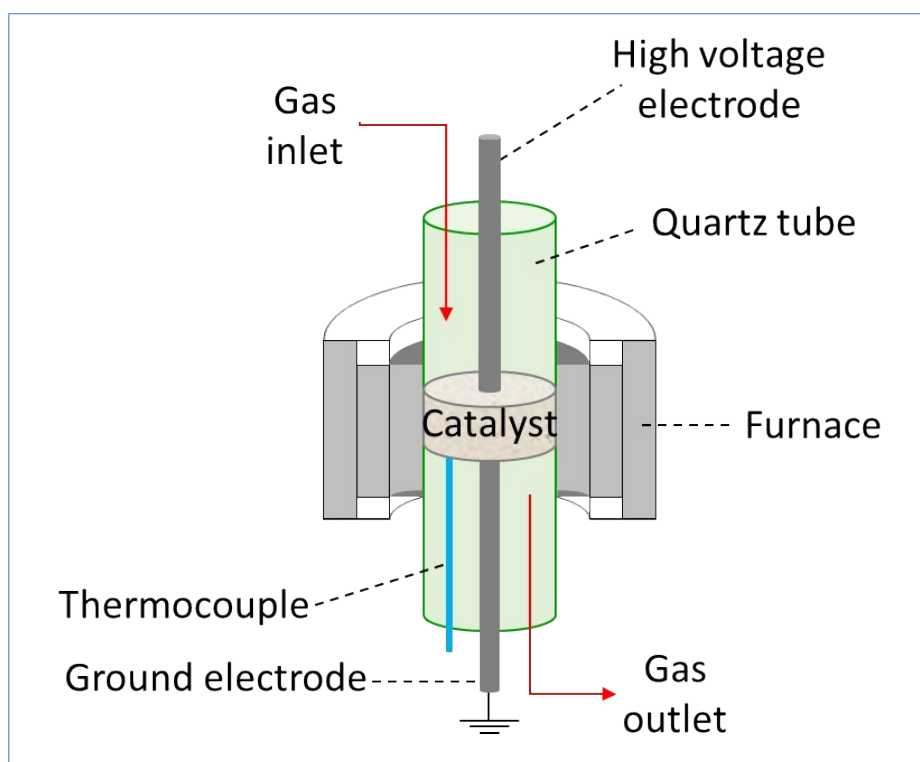

Figure S1 Schematic diagram of the reaction apparatus.

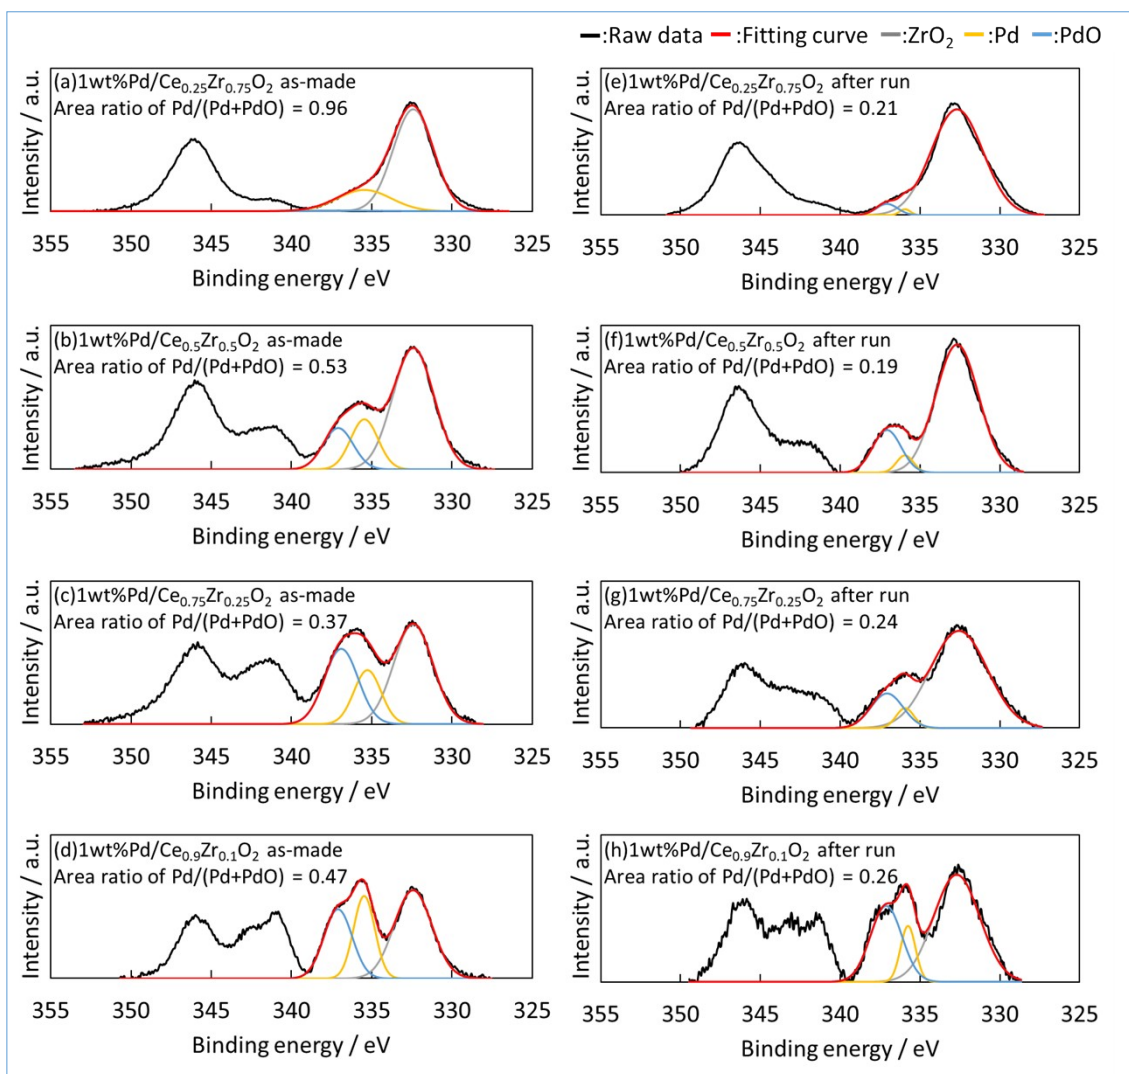

Figure S2 XPS profiles of 1wt%Pd/Ce<sub>x</sub>Zr<sub>1-x</sub>O<sub>2</sub> in as-made and after reaction under the humid conditions with the electric field (1 mA) up to 723 K.

No significant correlation was observed between the chemical state of Pd in after reaction and the order of activity test results.

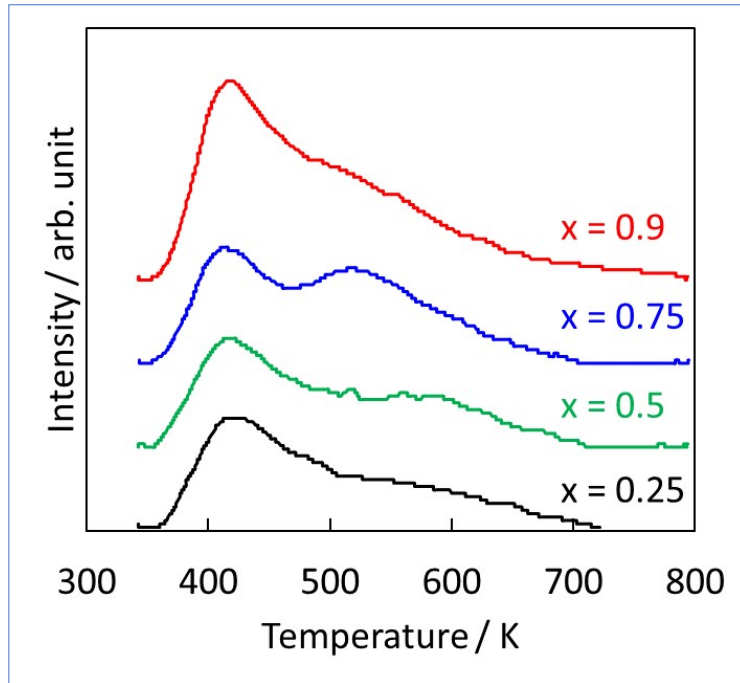

Figure S3 H<sub>2</sub>O-TPD profiles over 1wt%Pd/Ce<sub>x</sub>Zr<sub>1-x</sub>O<sub>2</sub>.

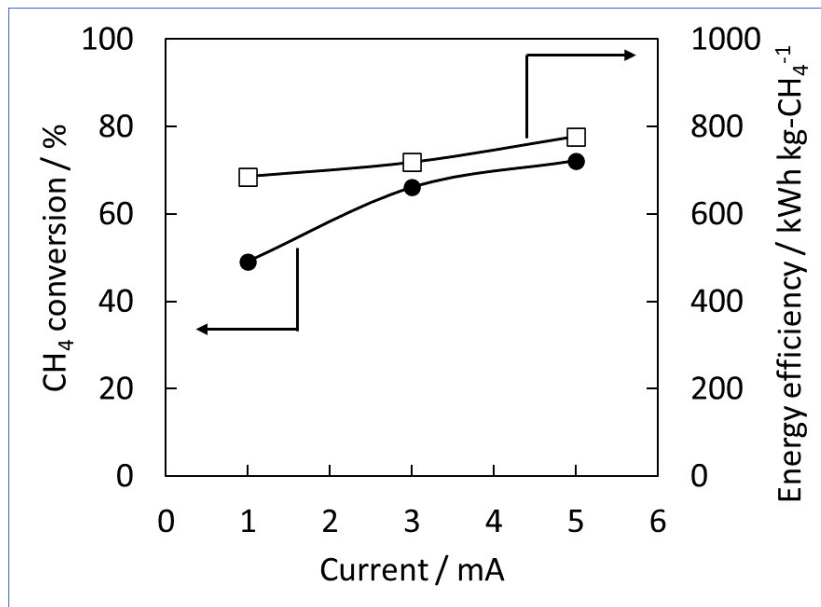

Figure S4 The results of current variation test and the energy efficiency over 1wt%Pd/Ce<sub>0.25</sub>Zr<sub>0.75</sub>O<sub>2</sub>

in the EF (1, 3, 5 mA) at 473 K, CH<sub>4</sub>: 2000ppm, O<sub>2</sub>: 10%, H<sub>2</sub>O: 10%, N<sub>2</sub> balance.

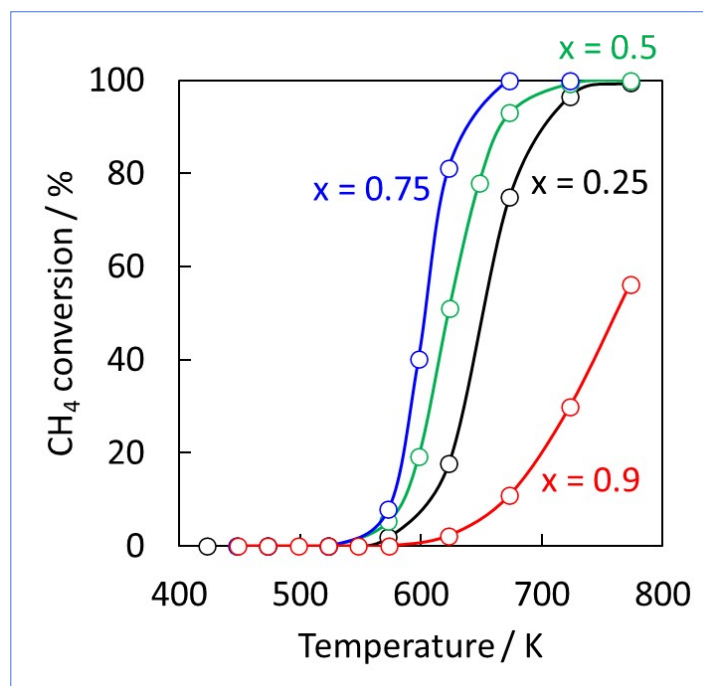

Figure S5 Methane conversion over 1wt%Pd/Ce<sub>x</sub>Zr<sub>1-x</sub>O<sub>2</sub> without the EF, CH<sub>4</sub>: 2000ppm, O<sub>2</sub>: 10%,  
H<sub>2</sub>O: 10%, N<sub>2</sub> balance.

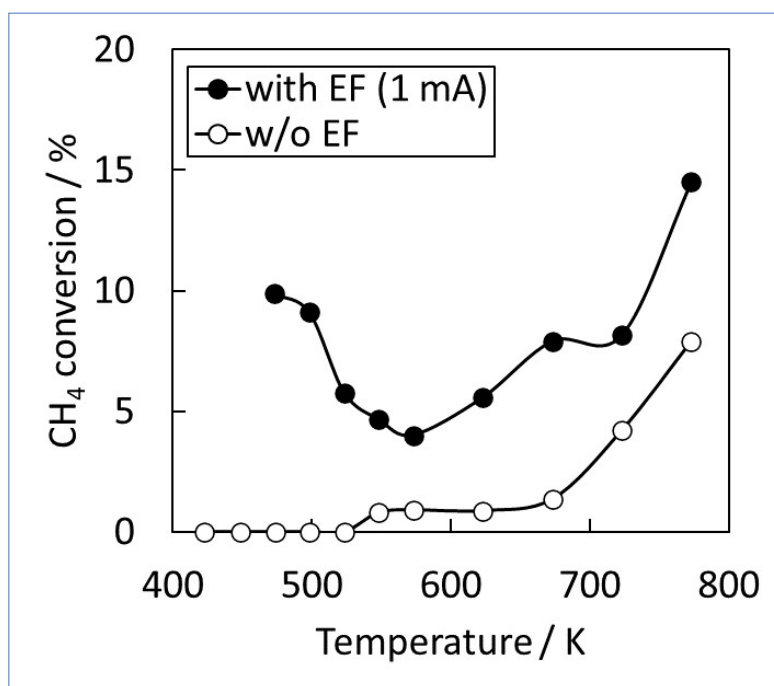

Figure S6 Methane conversion over Ce<sub>0.25</sub>Zr<sub>0.75</sub>O<sub>2</sub> with and without the EF.

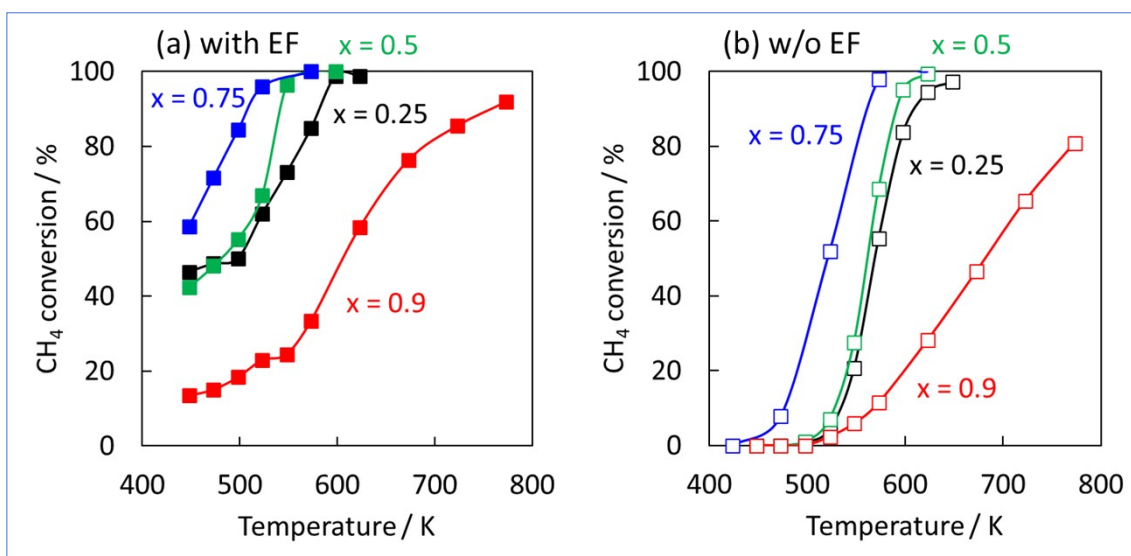

Figure S7 Methane conversion over 1wt%Pd/Ce<sub>x</sub>Zr<sub>1-x</sub>O<sub>2</sub>, (a) with the EF and (b) without the EF, CH<sub>4</sub>: 2000ppm, O<sub>2</sub>: 10%, N<sub>2</sub> balance.

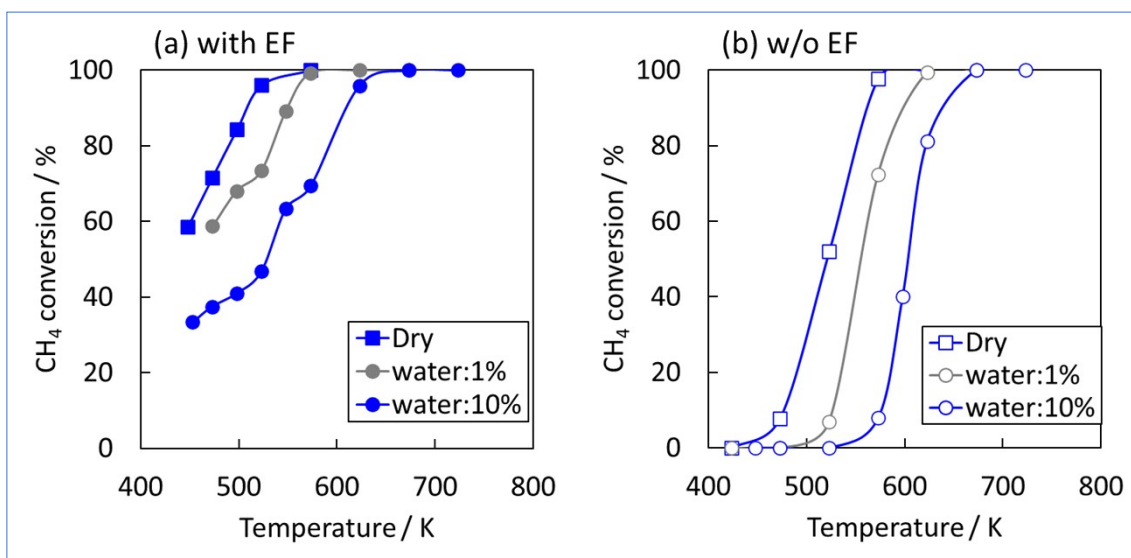

Figure S8 Methane conversion over 1wt%Pd/Ce<sub>0.75</sub>Zr<sub>0.25</sub>O<sub>2</sub> in various water vapour pressures, (a) with the EF and (b) without the EF.

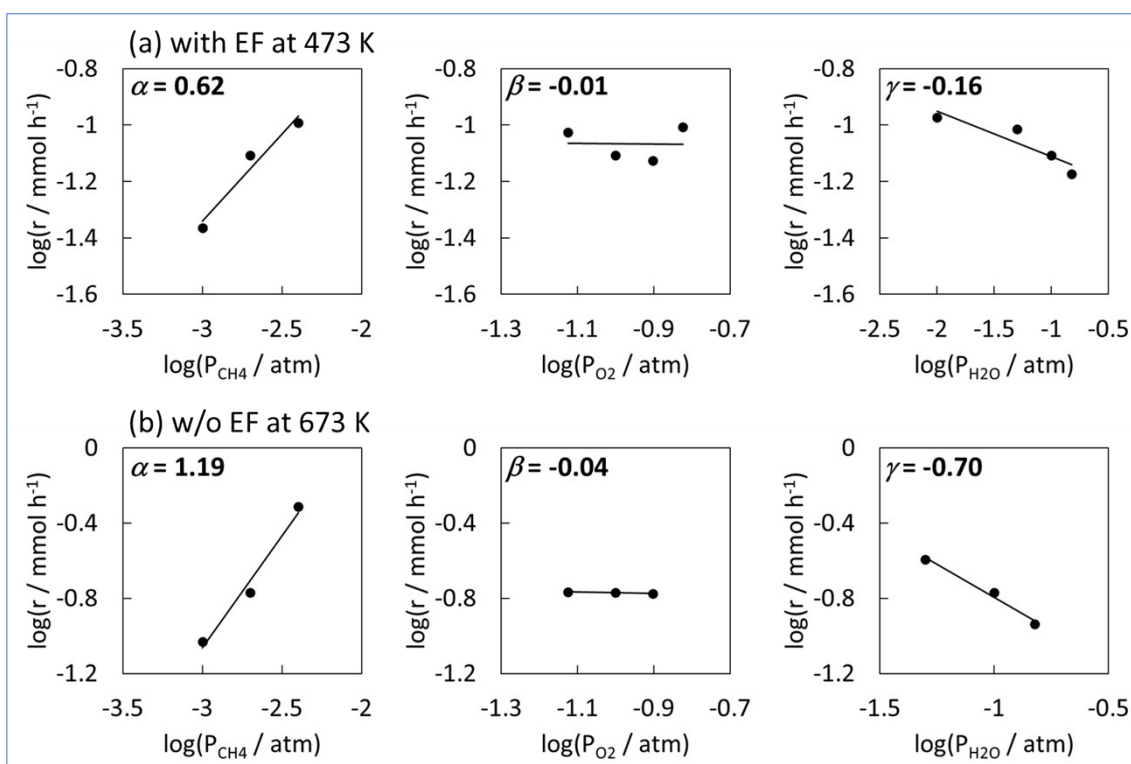

Figure S9 Methane, oxygen, and water pressure dependencies on the reaction rate of methane combustion in a kinetic range, (a) with the EF at 473 K and (b) without the EF at 673 K.

Catalyst: 60mg, total flow rate: 150 SCCM.

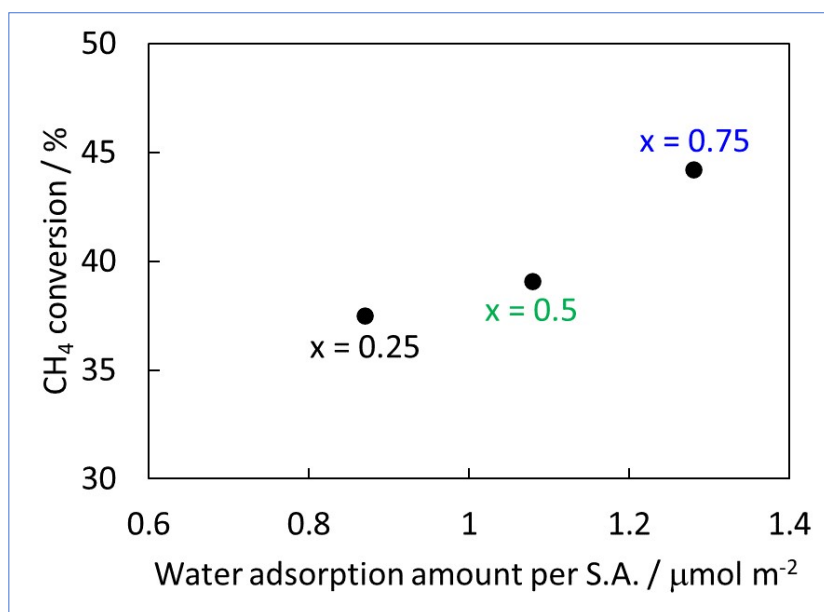

Figure S10 The relationship between water adsorption amount per surface area and the activity of the methane reaction with steam over 1wt%Pd/Ce<sub>x</sub>Zr<sub>1-x</sub>O<sub>2</sub> in the EF, 473 K, fixed electric field power (1 W).



Table S1 Calculation results of the Ce-Zr-O (111) lattice spacing and the lattice constant.

| Support                                              | (111) Lattice spacing<br>/ nm | Lattice constant<br>/ nm |
|------------------------------------------------------|-------------------------------|--------------------------|
| Ce <sub>0.25</sub> Zr <sub>0.75</sub> O <sub>2</sub> | 0.300                         | 0.450                    |
| Ce <sub>0.5</sub> Zr <sub>0.5</sub> O <sub>2</sub>   | 0.305                         | 0.457                    |
| Ce <sub>0.75</sub> Zr <sub>0.25</sub> O <sub>2</sub> | 0.309                         | 0.463                    |
| Ce <sub>0.9</sub> Zr <sub>0.1</sub> O <sub>2</sub>   | 0.311                         | 0.466                    |

Table S2 Results of methane complete oxidation in a humid condition with and without the electric field over 1wt%Pd/Ce<sub>0.25</sub>Zr<sub>0.75</sub>O<sub>2</sub> catalyst, CH<sub>4</sub>: 2000ppm, O<sub>2</sub>: 10%, H<sub>2</sub>O: 10%, N<sub>2</sub>: balance.

| EF             | Temperature / K | Voltage / kV | Methane<br>conversion / % | Selectivity / % |                 |
|----------------|-----------------|--------------|---------------------------|-----------------|-----------------|
|                |                 |              |                           | CO              | CO <sub>2</sub> |
| With<br>(1 mA) | 473             | 1.93         | 58.9                      | 0.7             | 99.3            |
|                | 498             | 1.94         | 61.0                      | 0.6             | 99.4            |
|                | 523             | 1.97         | 63.7                      | 0.2             | 99.8            |
|                | 548             | 1.90         | 68.8                      | 0.2             | 99.8            |
|                | 573             | 1.69         | 77.3                      | 0.0             | 100.0           |
|                | 623             | 1.47         | 92.3                      | 0.0             | 100.0           |
|                | 673             | 1.45         | 99.0                      | 0.0             | 100.0           |
|                | 723             | 1.40         | 100.0                     | 0.0             | 100.0           |
|                | 373             |              | 0.0                       | -               | -               |
|                | 423             |              | 0.0                       | -               | -               |
|                | 473             |              | 0.0                       | -               | -               |
|                | 523             |              | 0.0                       | -               | -               |
|                | Without         | 573          | -                         | 1.9             | 0.2             |
| 623            |                 |              | 17.7                      | 0.0             | 100.0           |
| 673            |                 |              | 74.8                      | 0.0             | 100.0           |
| 723            |                 |              | 86.5                      | 0.0             | 100.0           |
| 773            |                 |              | 99.5                      | 0.0             | 100.0           |

Table S3 Results of pressure changing tests with/without the electric field.

| Temp.<br>/ K             | $P_{CH_4}$<br>/ atm | $P_{O_2}$<br>/ atm | $P_{H_2O}$<br>/ atm | $r$<br>/ mmol h <sup>-1</sup> | V<br>/ kV | $r = kP_{CH_4}^\alpha P_{O_2}^\beta P_{H_2O}^\gamma$ |         |          |       |
|--------------------------|---------------------|--------------------|---------------------|-------------------------------|-----------|------------------------------------------------------|---------|----------|-------|
|                          |                     |                    |                     |                               |           | $\alpha$                                             | $\beta$ | $\gamma$ |       |
| 473<br>with EF<br>(1 mA) | 0.001               |                    |                     | 0.0433                        | 1.14      |                                                      |         |          |       |
|                          | 0.002               | 0.100              |                     | 0.0782                        | 0.98      |                                                      |         |          |       |
|                          | 0.004               |                    |                     | 0.1020                        | 0.80      |                                                      |         |          |       |
|                          |                     |                    | 0.075               | 0.100                         | 0.0943    | 1.15                                                 |         |          |       |
|                          |                     |                    | 0.100               |                               | 0.0782    | 0.98                                                 |         |          |       |
|                          |                     |                    | 0.125               |                               | 0.0748    | 1.03                                                 | 0.62    | -0.01    | -0.16 |
|                          | 0.002               | 0.150              |                     | 0.0983                        | 1.12      |                                                      |         |          |       |
|                          |                     |                    |                     | 0.010                         | 0.1067    | 1.17                                                 |         |          |       |
|                          |                     |                    | 0.100               | 0.050                         | 0.0969    | 1.10                                                 |         |          |       |
|                          |                     |                    |                     | 0.100                         | 0.0782    | 0.98                                                 |         |          |       |
|                          |                     |                    | 0.150               | 0.0670                        | 1.02      |                                                      |         |          |       |
| 673<br>w/o EF            | 0.001               |                    |                     | 0.0932                        |           |                                                      |         |          |       |
|                          | 0.002               | 0.100              |                     | 0.1704                        |           |                                                      |         |          |       |
|                          | 0.004               |                    |                     | 0.4866                        |           |                                                      |         |          |       |
|                          |                     |                    | 0.100               | 0.1707                        |           |                                                      |         |          |       |
|                          |                     |                    | 0.010               | 0.1704                        | -         | 1.19                                                 | -0.04   | -0.70    |       |
|                          | 0.002               | 0.125              |                     | 0.1675                        |           |                                                      |         |          |       |
|                          |                     |                    | 0.050               | 0.2542                        |           |                                                      |         |          |       |
|                          |                     | 0.100              | 0.100               | 0.1704                        |           |                                                      |         |          |       |
|                          |                     |                    | 0.150               | 0.1156                        |           |                                                      |         |          |       |
